# Supplementary material for: Association of vitamin C intake with breast cancer risk and mortality: a meta-analysis of observational studies
Source: publisher site journal article supplement (doi:10.18632/aging.103769), 2020-09-28
Supplement: Supplementary file [file aging-v12i18-103769-supplementary-material-SD1.pdf]

**SUPPLEMENTARY FIGURES**

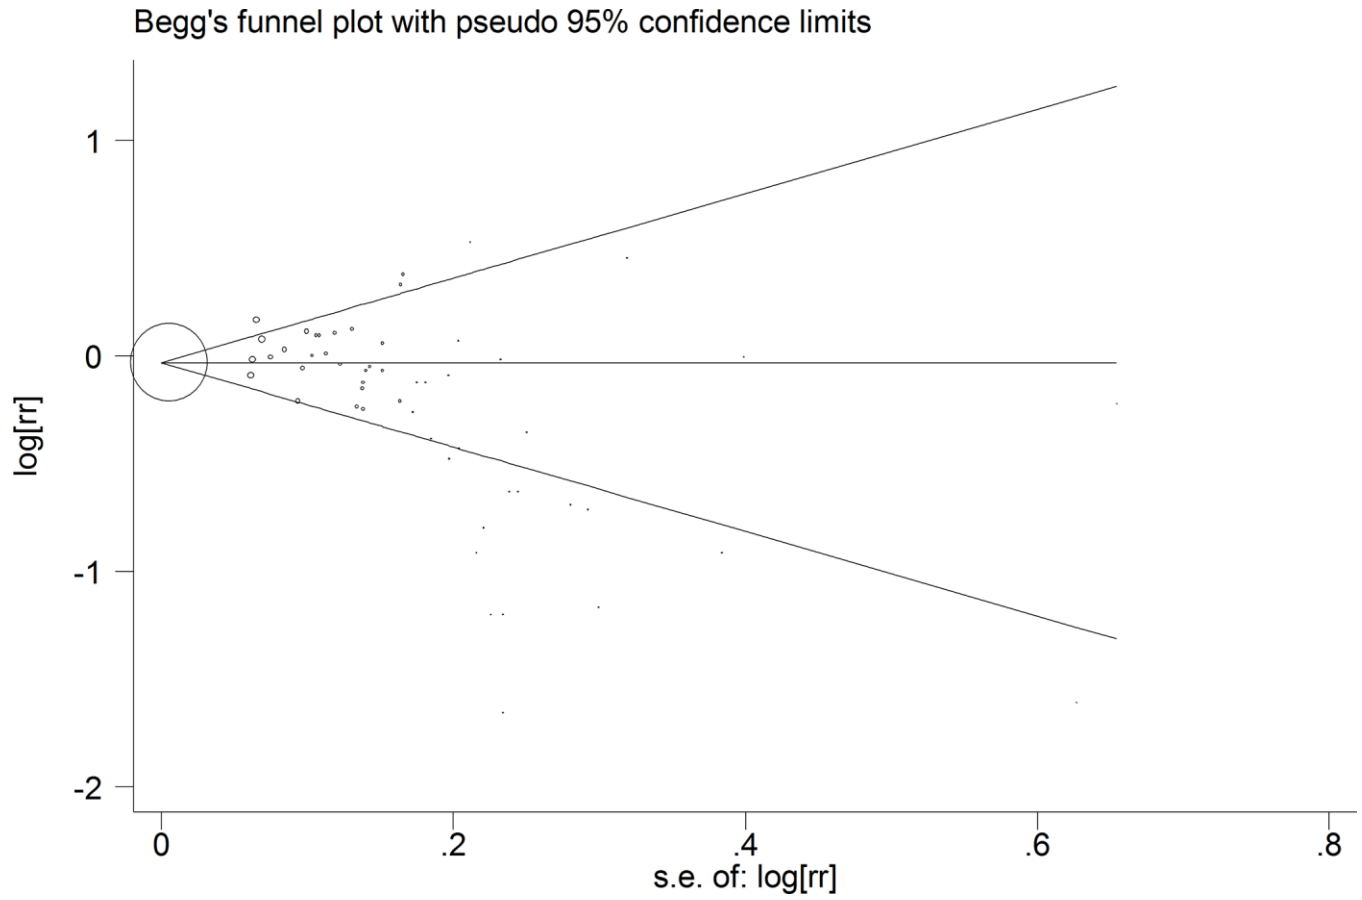

Supplementary Figure 1. Funnel plot of meta-analysis of breast cancer risk in relation to highest vs lowest categories of vitamin C intake.

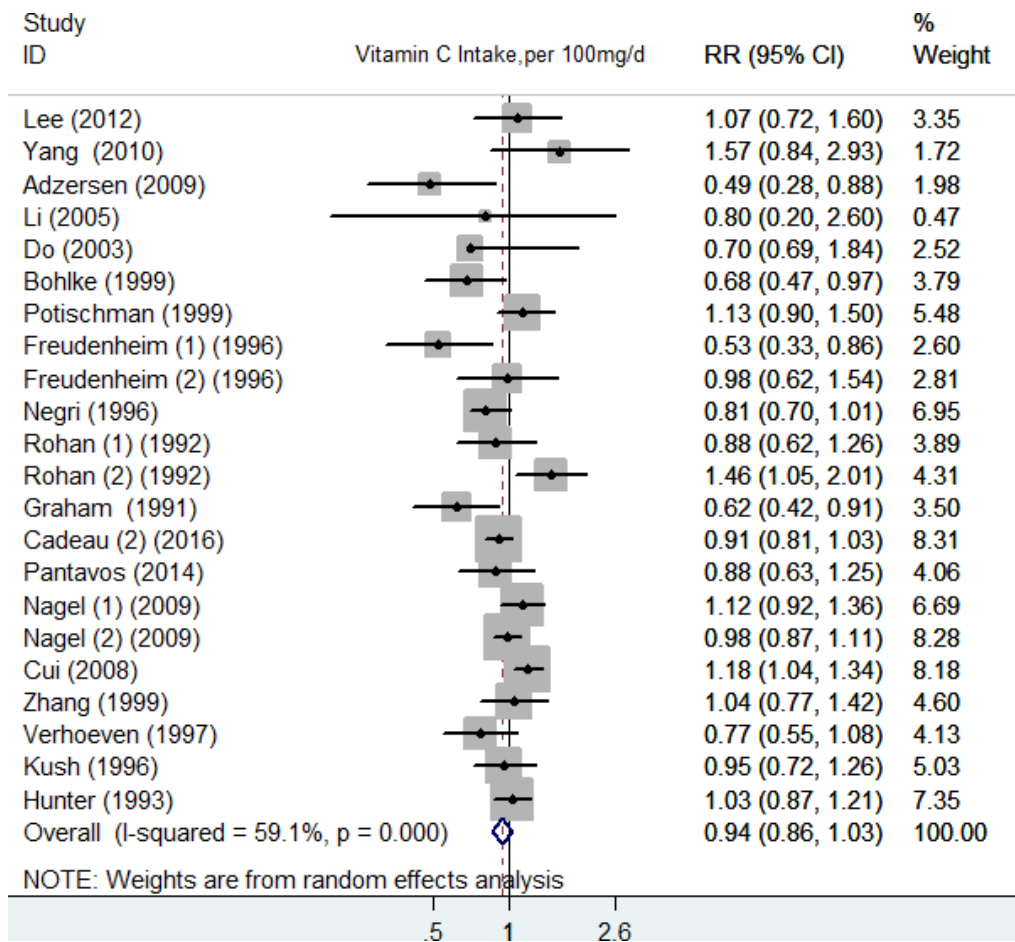

**Supplementary Figure 2. Forest plot of meta-analysis of the association between vitamin C intake increment (per 100 mg/d) and breast cancer risk.** Abbreviations: RR, relative risk; CI, confidence interval.

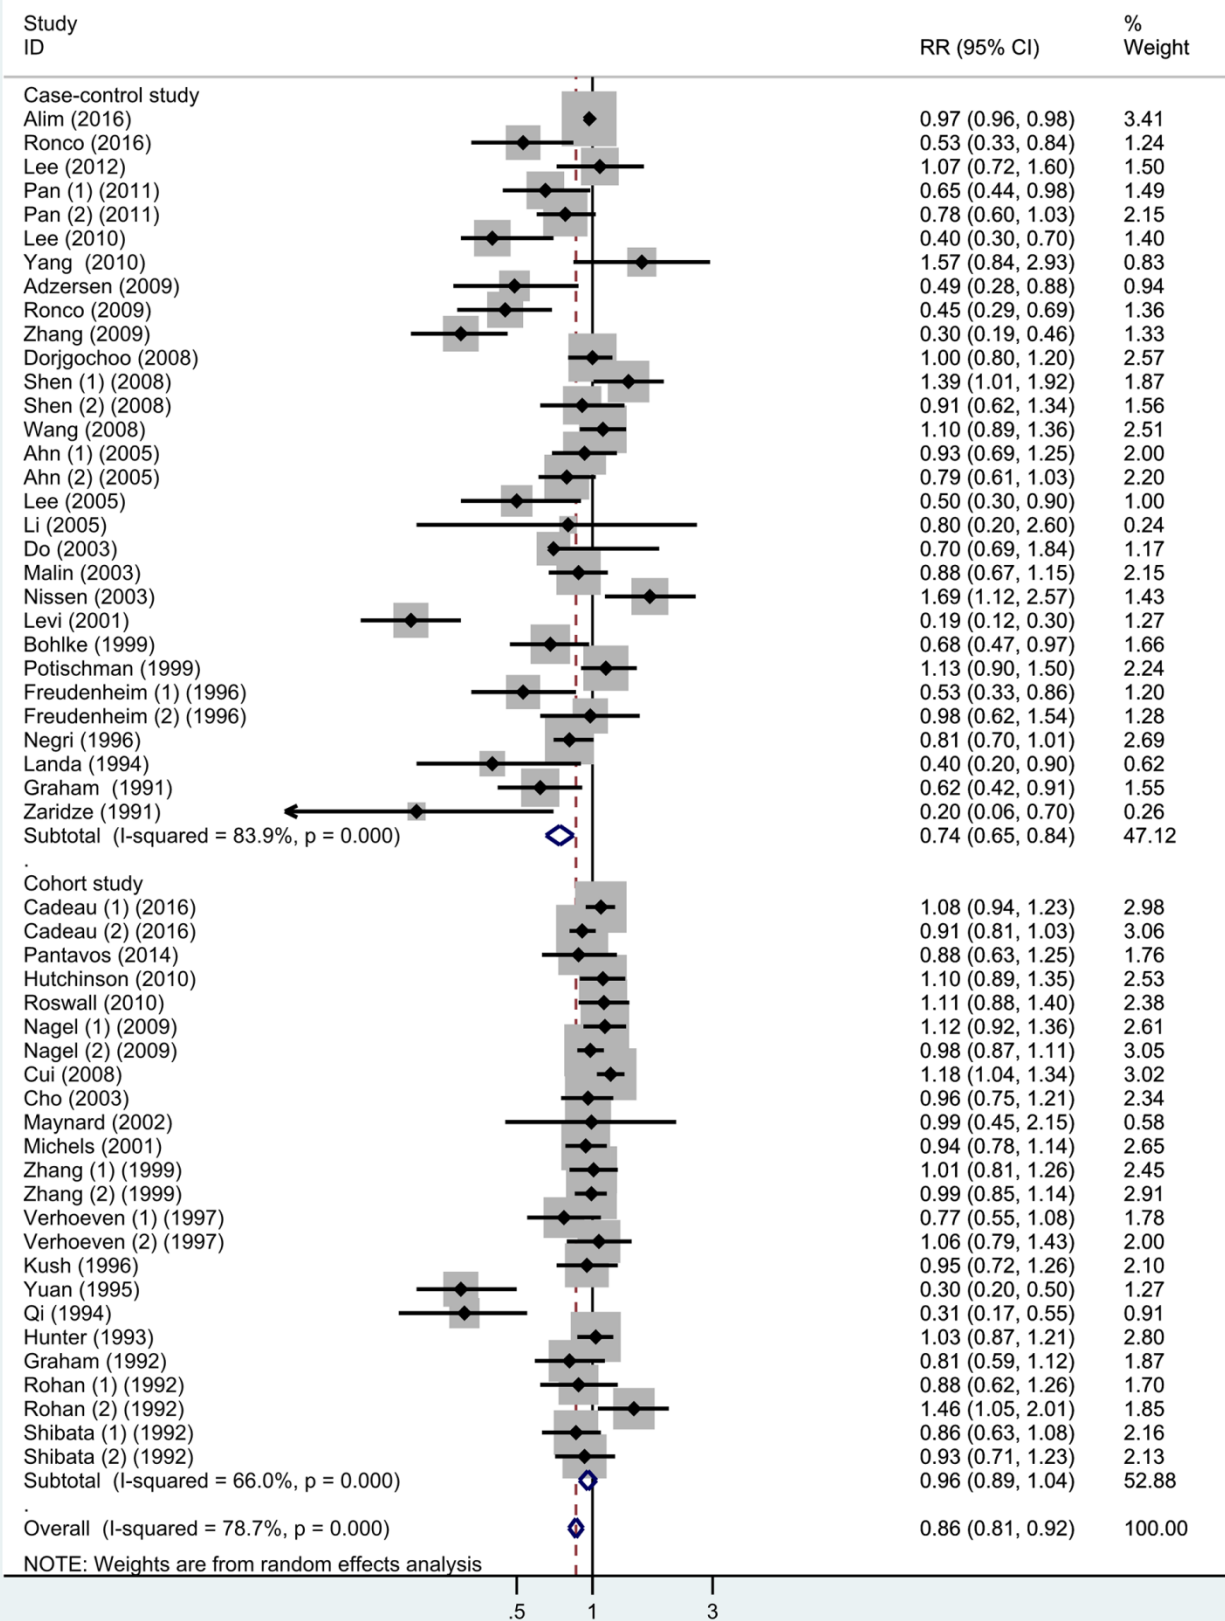

**Supplementary Figure 3. Subgroup analyses of the associations between vitamin C intake and breast cancer risk stratified by study design.** Abbreviations: RR, relative risk; CI, confidence interval.

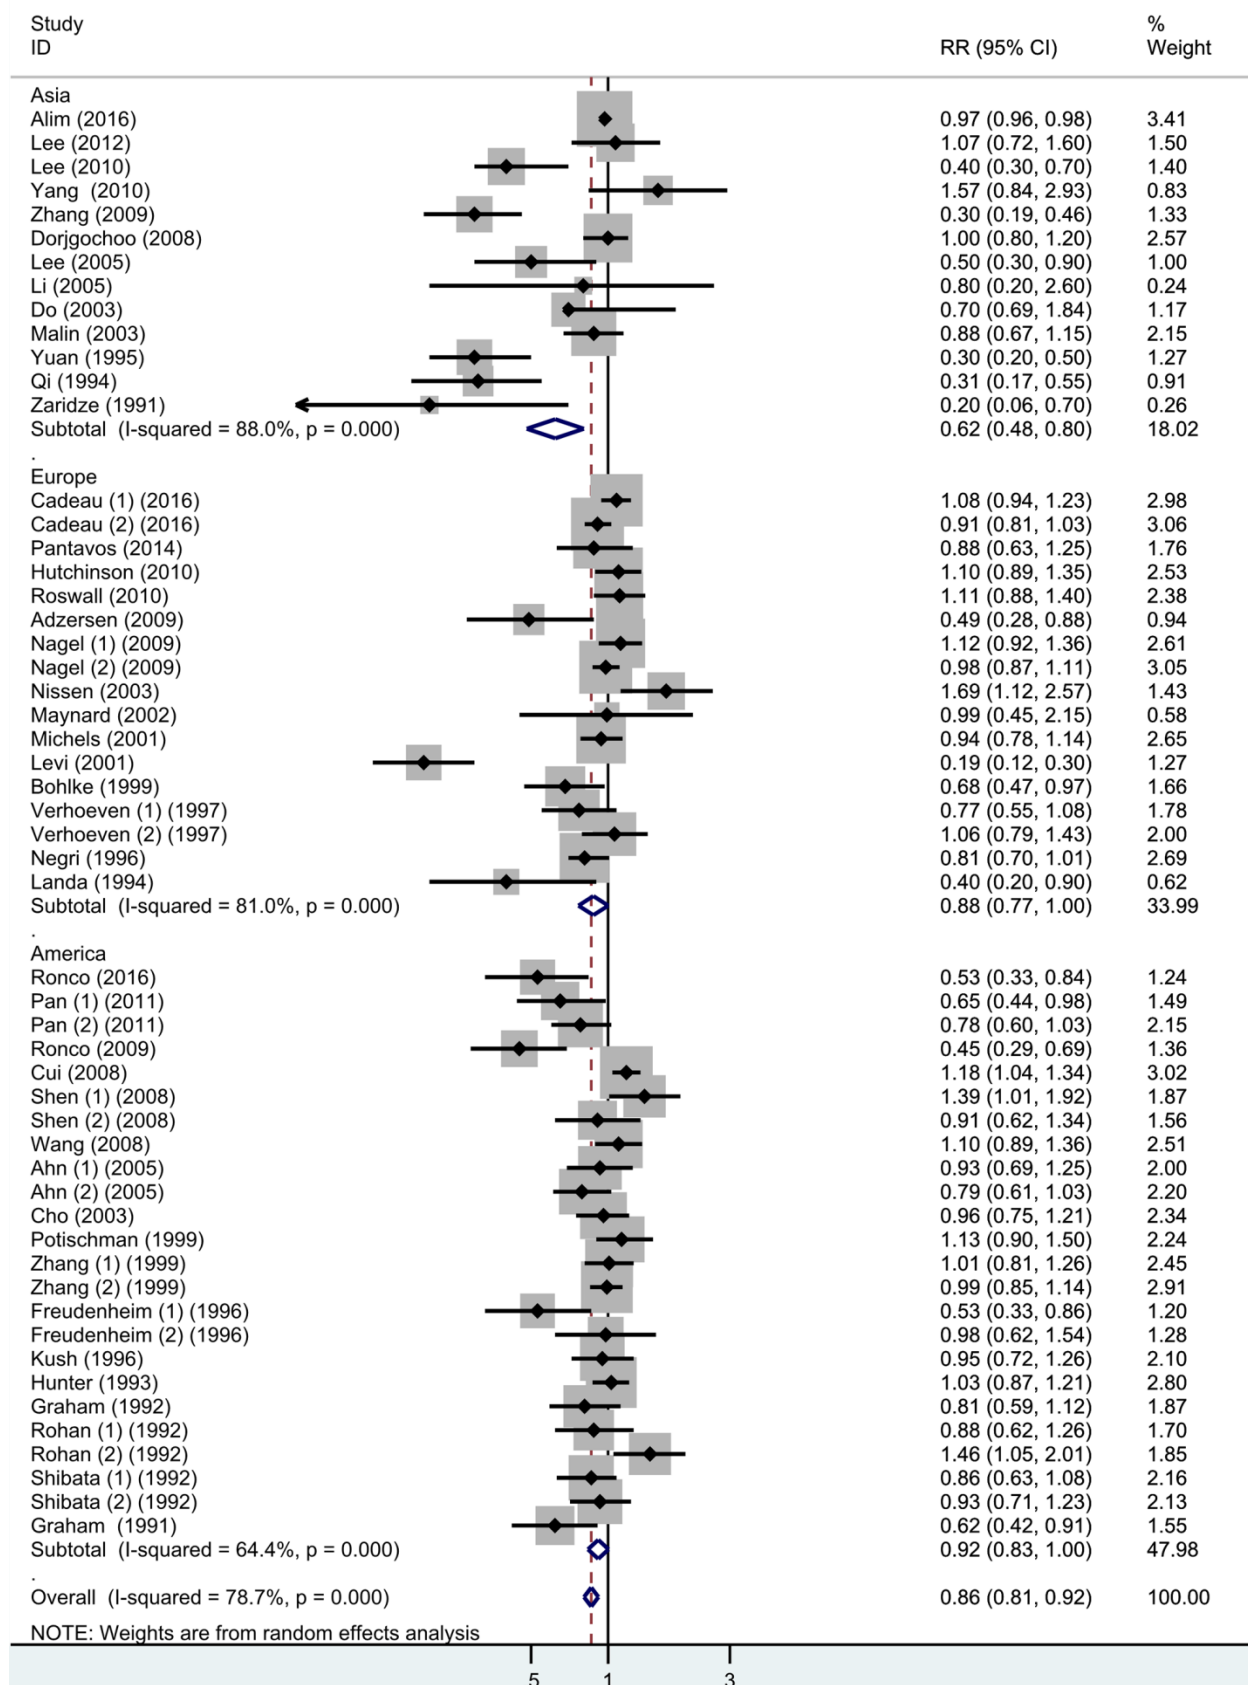

**Supplementary Figure 4. Subgroup analyses of the associations between vitamin C intake and breast cancer risk stratified by geographic locations.** Abbreviations: RR, relative risk; CI, confidence interval.

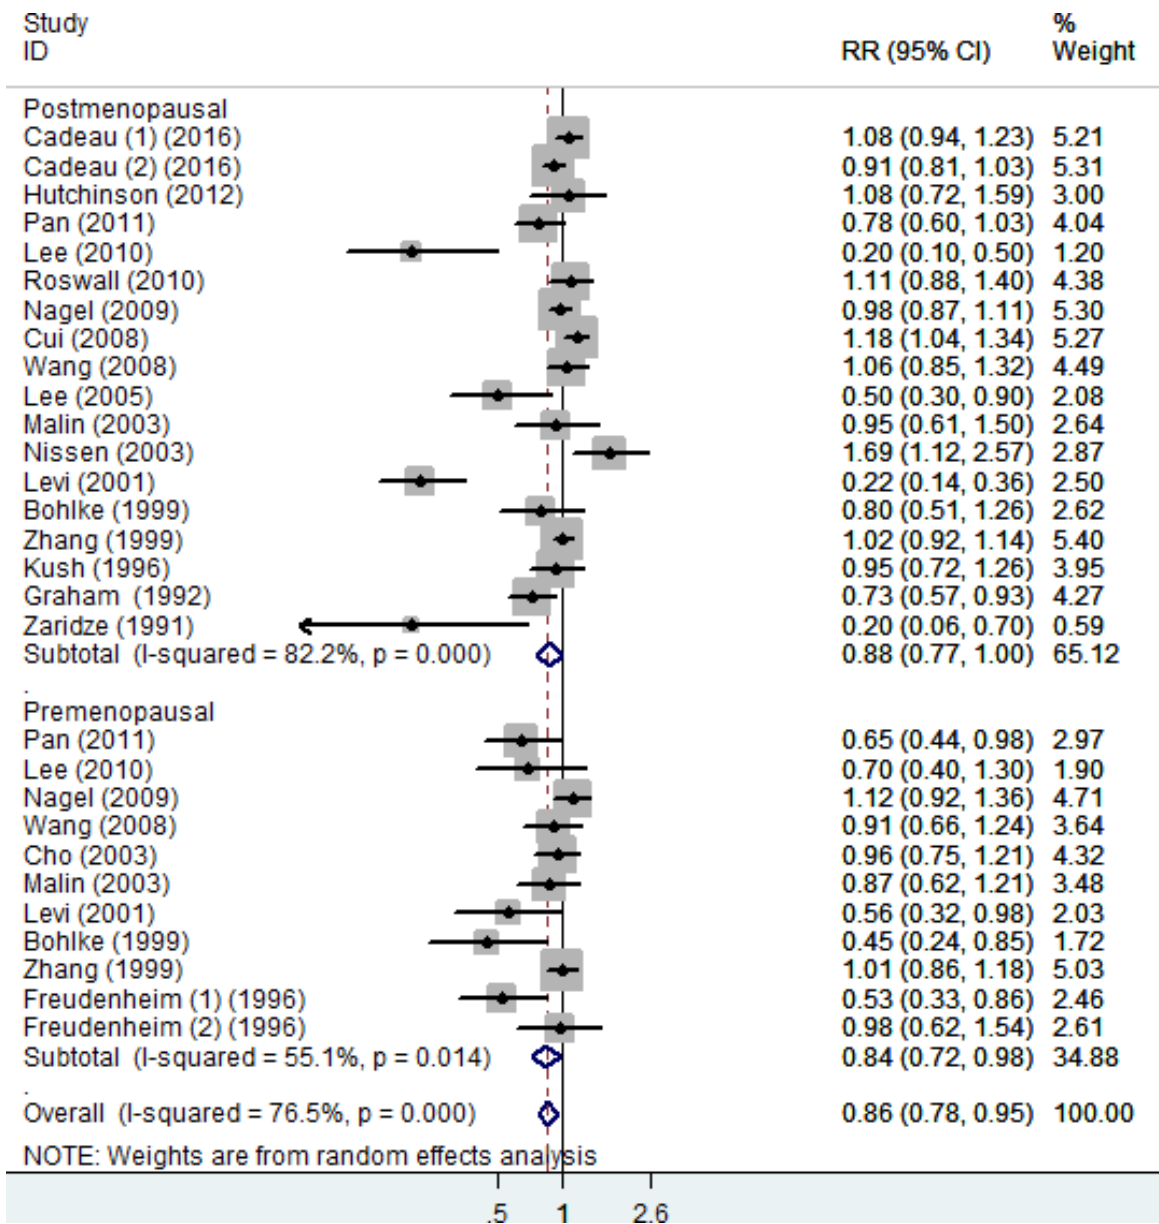

**Supplementary Figure 5. Subgroup analyses of the associations between vitamin C intake and breast cancer risk stratified by menopausal status.** Abbreviations: RR, relative risk; CI, confidence interval.
