# Supplementary material for: Association of vitamin C intake with breast cancer risk and mortality: a meta-analysis of observational studies
Source: publisher site journal article supplement (doi:10.18632/aging.103769), 2020-09-28
Supplement: Supplementary file [file aging-v12i18-103769-supplementary-material-SD3.pdf]

## SUPPLEMENTARY TABLE

**Supplementary Table 2. Characteristics of studies included in the meta-analysis of vitamin C intake and breast cancer survival.**

| Author           | Country<br>Study<br>type       | Follow-up<br>period<br>(year) | Age (year) | No. of<br>cases/deaths/<br>recurrence | Estimation<br>target                                                                   | Vitamin C<br>Intake (mg/day)                            | Adjusted<br>HR(95%CI) <sup>a</sup>                       | Adjustment factors                                                                                                                                                                                                                                                                                                                                                                                                                                                                                                |
|------------------|--------------------------------|-------------------------------|------------|---------------------------------------|----------------------------------------------------------------------------------------|---------------------------------------------------------|----------------------------------------------------------|-------------------------------------------------------------------------------------------------------------------------------------------------------------------------------------------------------------------------------------------------------------------------------------------------------------------------------------------------------------------------------------------------------------------------------------------------------------------------------------------------------------------|
| Harris<br>2013   | Sweden<br>Cohort               | 7.8                           | Mean<br>65 | 3405/1055<br>3405/416                 | Death From All<br>Causes<br>Death From<br>Breast Cancer                                | >92.5 vs <42.9<br>Highest /<br>Lowest                   | 0.84 (0.71–1.00)<br>0.75 (0.57–0.99)                     | Age, energy intake,<br>education level, marital<br>status, menopausal status at<br>diagnosis, body mass index,<br>alcohol intake and calendar<br>year of diagnosis.                                                                                                                                                                                                                                                                                                                                               |
| Poole<br>2013    | USA<br>Cohort                  | 5                             | Mean.54.8  | 10222/659<br>10222/955                | Death From<br>Breast Cancer<br>Death From All<br>Causes                                | Highest/Lowest<br>Highest /<br>Lowest                   | 0.87 (0.73–1.03)<br>0.82 (0.71–0.95)                     | Age at diagnosis, exercise,<br>stage, treatment, BMI,<br>smoking, menopausal status,<br>race                                                                                                                                                                                                                                                                                                                                                                                                                      |
| Greenlee<br>2012 | USA<br>Cohort                  | 10                            | 18-79      | 2264/214<br>2264/393<br>2264/375      | Death From<br>Breast Cancer<br>Death From All<br>Causes<br>Breast Cancer<br>Recurrence | Highest/Lowest<br>Highest /<br>Lowest<br>Highest/Lowest | 0.71 (0.54–0.92)<br>0.78 (0.61–1.01)<br>0.82 (0.58–1.16) | Age at diagnosis,<br>race/ethnicity, education,<br>breast cancer stage at<br>diagnosis, number positive<br>lymph nodes, tumor<br>hormone receptor status,<br>chemotherapy received,<br>radiation therapy received,<br>hormone therapy received,<br>body mass index 1 year<br>before diagnosis, smoking<br>history at enrollment,<br>alcohol consumption at<br>enrollment, physical activity<br>at enrollment, daily servings<br>of fruits and vegetables at<br>enrollment, and comorbidity<br>score at enrollment |
| Nechuta<br>2011  | China<br>Cohort                | 4.1                           | 20-75      | 4877/444<br>4877/532                  | Death From All<br>Causes<br>Breast Cancer<br>Recurrence                                | Highest /<br>Lowest                                     | 0.81 (0.61–1.07)                                         | Age, ER/PR status, TNM<br>stage, chemotherapy,<br>radiotherapy, tamoxifen use,<br>education, income, BMI,<br>regular tea consumption,<br>regular exercise<br>participation, daily<br>cruciferous vegetable intake,<br>daily soy protein intake, and<br>other vitamin variables                                                                                                                                                                                                                                    |
| Saquib<br>2011   | USA<br>Cohort                  | 9                             | 53         | 3081/412                              | Death From All<br>Causes                                                               | Highest/Lowest                                          | 1.1 (0.79–1.6)                                           | Age at randomization, tumor<br>stage, tumor grade, time<br>since diagnosis, BMI,<br>smoking, randomization<br>group, hot flashes, group by<br>hot flash interaction, and<br>physical health                                                                                                                                                                                                                                                                                                                       |
| Rohan<br>2009    | Australia<br>Case -<br>control | -                             | 20-74      | 412/412                               | Death From<br>Breast Cancer                                                            | >234 vs ≤71                                             | 0.74 (0.42–1.30)                                         | Age at menarche, Quetelet<br>index, age at 1st live birth,<br>energy, education, history of<br>benign breast disease,<br>menopausal status, height,<br>weight, ER,PR status                                                                                                                                                                                                                                                                                                                                       |
| McEligot<br>2006 | USA<br>Cohort                  | 1                             | Mean.65    | 516/96                                | Death From All<br>Causes                                                               | Q3 vs Q1                                                | 0.45 (0.25–0.78)                                         | Age at diagnosis, stage of<br>disease, body mass index,<br>parity, hormone replacement<br>therapy use, alcohol use,<br>multivitamin use, and<br>energy intake,<br>micronutrients                                                                                                                                                                                                                                                                                                                                  |

|                 |                  |    |         |          |                             |                     |                  |                                                                                                                                                                                                                                                             |
|-----------------|------------------|----|---------|----------|-----------------------------|---------------------|------------------|-------------------------------------------------------------------------------------------------------------------------------------------------------------------------------------------------------------------------------------------------------------|
| Maynard<br>2002 | UK<br>Cohort     | 8  | NA      | 101/36   | Death From<br>Breast Cancer | Highest/Lowest      | 0.58 (0.19–1.84) | Age, and energy intake,<br>BMI, family history of<br>breast cancer, smoking<br>status                                                                                                                                                                       |
| Holmes<br>1999  | USA<br>Cohort    | 13 | Mean.54 | 1982/378 | Death From All<br>Causes    | Q5 vs Q1            | 0.80 (0.58–1.10) | Age, diet interval, calendar<br>year of diagnosis, body<br>mass index, oral<br>contraceptive use,<br>menopausal status,<br>postmenopausal hormone<br>use, smoking, age at first<br>birth and parity, number of<br>metastatic lymph nodes, and<br>tumor size |
| Jain<br>1994    | Canada<br>Cohort | 5  | 40-59   | 673/76   | Death From<br>Breast Cancer | >201.3 vs<br>≤11.07 | 0.43 (0.21–0.86) | Total energy, age at<br>diagnosis, smoking, and<br>body weight                                                                                                                                                                                              |

Abbreviations: HR, hazard risk; CI=confidence interval; Ref, reference; NO. of cases/deaths/recurrence, number of cases/deaths/recurrence; BMI=body mass index (kg/m<sup>2</sup>); ER, estrogen receptor; PR, progesterone receptor; TNM, tumor, Node, Metastasis.

<sup>a</sup>The HRs of all studies used the lowest category of vitamin C intake levels as a reference in the meta-analysis.
